# Supplementary material for: Discovery of Novel MicroRNAs in Female Reproductive Tract Using Next Generation Sequencing
Source: PLoS One. 2010 Mar 10;5(3):e9637. doi: 10.1371/journal.pone.0009637 (PMC2835764; doi:10.1371/journal.pone.0009637)
Supplement: Supporting Data File S1 — The set of 132 putative novel miRNAs with sequence copy counts for each sample. (0.17 MB XLS) [file pone.0009637.s001.xls]

## Sheet: Putative novel miRNAs
Putative novel miR	Novel hairpin	Confidence level	UCSC Blat	Putative Mature (PMM) Forward Sequence	Exact Matches to Forward PMM	Exact Matches to PMM(+4)	Putative Reverse Sequence	Exact Matches to Reverse (+4)	Tissue Type	Tissue Origin	Hairpin Direction	Hairpin Start Position	Hairpin End Position	Sample#_Run#	Exact Matches to PMM	Exact Matches to PMM(+4)	Exact Matches to Star	Exact Matches to Star (+4)	Exact Matches to Hairpin
hsa-bcm-miR-3	hairpin_3	High confidence	Intergenic	ACAGGAAAGAATAAGAAGTCAT	5	5		0	Clear cell culture	A2780 clear cell culture, confluent	-1	20107032	20107214	s2_run17	5	5	0	0	5
					6	6		0	Secretory	Human Myo 8				s6_run23	6	6	0	0	6
hsa-bcm-miR-4	hairpin_4	Potential	SNORD38	GTAAGTGAAGATAAAGTGTGTCTGAGG	16	31		59	Serous	Primary Human 15b	1	45016593	45016775	s6_run34	16	31	0	59	90
					0	14		0	NOSE cell culture	NOSE cell culture				s5_run10	0	14	0	0	14
					0	6		6	Clear cell culture	OVAS clear cell culture, confluent				s3_run10	0	6	0	6	12
					77	208		17	Serous	Borderline Human 12				s5_run34	77	208	0	17	225
					8	44		0	Endometrium	EM12				s6_run10	8	44	0	0	44
					0	17		6	Secretory	Human Fib 7				s3_run19	0	17	0	6	23
					14	77		0	Clear cell culture	IGROV1 clear cell culture, confluent				s2_run10	14	77	0	0	77
					0	17		0	NOSE cell culture	NOSE cell culture				s1_run10	0	17	0	0	17
hsa-bcm-miR-5	hairpin_5	Not likely	No match	CTGGGCAACAGAGCGAGACCGTCTTTT	8	15		0	Clear cell culture	OVISE clear cell culture, subconfluent	1	44249148	44249328	s5_run9	8	15	0	0	15
hsa-bcm-miR-7	hairpin_7	Potential	SINE	TTGAGGTCGGACATGGTGGCT	17	17		0	Cyst wall	CW9	-1	39682599	39682775	s2_run7	17	17	0	0	17
					15	15		0	Endometrium	Endomet 1				s4_run7	15	15	0	0	15
					5	5		0	Endometrioid	EC1				s8_run35	5	5	0	0	5
hsa-bcm-miR-8	hairpin_8	Confirmed	Intergenic	ATCCCCAGATACAATGGACAAT	9	9	ATTGTCCTTGCTGTTTGGAGAT	5	SKN (Cell Line)	SKN	-1	207682912	207683088	s5_run19	9	9	0	5	14
					9	9		6	Secretory	Human Fib 16				s8_run39	9	9	0	6	15
					24	41		19	Secretory	Human Myo 14				s5_run45	24	41	0	19	60
					16	25		6	Proliferative	Human Fib 3				s3_run11	16	25	0	6	31
					15	25		7	Proliferative	Human Myo 15				s5_run39	15	25	0	7	32
					7	7		5	Clear cell culture	RMG1 clear cell culture, confluent				s5_run17	7	7	0	5	12
					7	12		17	ULMS	FM 146				s4_run40	7	12	0	17	29
					14	20		6	Secretory	Human Fib 13				s7_run29	14	20	0	6	26
					22	36		7	Proliferative	Human Fib 17				s7_run40	22	36	0	7	43
					10	16		15	Secretory	Human Myo 16				s7_run39	10	16	0	15	31
					12	12		9	Cyst wall	ENDO M1				s8_run17	12	12	0	9	21
					7	19		9	Proliferative	Human Myo 17				s6_run40	7	19	0	9	28
					8	8		7	Endometrioid	EC2				s5_run36	8	8	0	7	15
hsa-bcm-miR-10	hairpin_10	Not likely	Intergenic	ACCCCACTCCTGGTACCA	487	612		0	Serous	Primary Human 15b	1	10561856	10562027	s6_run34	487	612	0	0	612
hsa-bcm-miR-12	hairpin_12	Potential	SINE	ACCTGAGCCACTGCACCCGGCT	10	25		0	Clear cell culture	OVSAYO clear cell culture, confluent	1	55098064	55098229	s7_run17	10	25	0	0	25
hsa-bcm-miR-14	hairpin_14	Potential	Intron CALR	TTGGAGGGTGTGGAAGACAT	5	5		0	Clear cell culture	A2780 clear cell culture, confluent	1	12912255	12912412	s2_run17	5	5	0	0	5
					5	5		0	Cyst wall	CW9				s2_run7	5	5	0	0	5
hsa-bcm-miR-15-1	hairpin_15	High confidence	Intergenic	TGGGGCGGAGCTTCCGGAG	22	41		0	Serous	Primary Human 15b	-1	15156208	15156360	s6_run34	22	41	0	0	41
					7	38		0	Clear cell culture	IGROV1 clear cell culture, confluent				s2_run10	7	38	0	0	38
					10	18		0	Endometrioid	EC1				s8_run35	10	18	0	0	18
					15	32		0	Clear cell culture	OVAS clear cell culture, confluent				s3_run10	15	32	0	0	32
					36	100		0	Clear cell culture	OVTOKO clear cell culture, confluent				s2_run11	36	100	0	0	100
					0	18		0	Clear cell culture	TOV21G clear cell culture, confluent				s2_run9	0	18	0	0	18
hsa-bcm-miR-15-2	hairpin_16	High confidence	Intergenic	TGGGGCGGAGCTTCCGGAG	22	41		0	Serous	Primary Human 15b	-1	2125979	2126131	s6_run34	22	41	0	0	41
					7	38		0	Clear cell culture	IGROV1 clear cell culture, confluent				s2_run10	7	38	0	0	38
					10	18		0	Endometrioid	EC1				s8_run35	10	18	0	0	18
					15	32		0	Clear cell culture	OVAS clear cell culture, confluent				s3_run10	15	32	0	0	32
					36	100		0	Clear cell culture	OVTOKO clear cell culture, confluent				s2_run11	36	100	0	0	100
					0	18		0	Clear cell culture	TOV21G clear cell culture, confluent				s2_run9	0	18	0	0	18
hsa-bcm-miR-15-3	hairpin_17	High confidence	Intergenic	TGGGGCGGAGCTTCCGGAG	22	41		0	Serous	Primary Human 15b	1	16311259	16311411	s6_run34	22	41	0	0	41
					7	38		0	Clear cell culture	IGROV1 clear cell culture, confluent	-1	18403451	18403603	s2_run10	7	38	0	0	38
					10	18		0	Endometrioid	EC1				s8_run35	10	18	0	0	18
					15	32		0	Clear cell culture	OVAS clear cell culture, confluent				s3_run10	15	32	0	0	32
					36	100		0	Clear cell culture	OVTOKO clear cell culture, confluent				s2_run11	36	100	0	0	100
					0	18		0	Clear cell culture	TOV21G clear cell culture, confluent				s2_run9	0	18	0	0	18
hsa-bcm-miR-19	hairpin_19	High confidence	Intron CRYGN	AGGTGCTCCAGGCTGGCTCACA	10	15		0	Serous	Primary Human 15b	-1	150761508	150761658	s6_run34	10	15	0	0	15
hsa-bcm-miR-21-1	hairpin_21	Confirmed	Intron BC058547 -	TGTGATATCATGGTTCCTGGGA	89	136	CTGGGAGGTGTGATATTGTGGT	11	Clear cell culture	ES2 clear cell culture, subconfluent	-1	136881792	136881939	s3_run9	89	136	0	11	147
					10	10		0	ULMS	U4				s5_run29	10	10	0	0	10
hsa-bcm-miR-22	hairpin_22	High confidence	Intron PHC2	GATGAGGATGGATAGCAAGGAAG	9	27		0	Serous	Primary Human 15b	-1	33570591	33570735	s6_run34	9	27	0	0	27
					5	15		0	Clear cell culture	OVMANA clear cell culture, confluent				s4_run17	5	15	0	0	15
					0	15		0	Clear cell culture	ES2 clear cell culture, subconfluent				s3_run9	0	15	0	0	15
					0	12		0	Secretory	Human Myo 10				s5_run21	0	12	0	0	12
					7	33		0	Clear cell culture	RMG1 clear cell culture, confluent				s5_run17	7	33	0	0	33
					7	42		0	Clear cell culture	A2780 clear cell culture, confluent				s2_run17	7	42	0	0	42
					5	13		0	Endometrioid	EC1				s8_run35	5	13	0	0	13
					6	12		0	Cyst wall	M4				s7_run10	6	12	0	0	12
					0	10		0	Secretory	Human Myo 8				s6_run23	0	10	0	0	10
					0	11		0	Secretory	Human Fib 8				s7_run23	0	11	0	0	11
					0	6		0	NOSE cell culture	NOSE cell culture				s1_run9	0	6	0	0	6
					0	5		0	Cyst wall	Endo M2				s3_run7	0	5	0	0	5
					0	8		0	Clear cell culture	TOV21G clear cell culture, confluent				s2_run9	0	8	0	0	8
					6	52		0	Endometrium	EM30				s8_run19	6	52	0	0	52
					0	19		0	Proliferative	Human Myo 9				s8_run23	0	19	0	0	19
					7	20		0	NOSE cell culture	NOSE cell culture				s4_run10	7	20	0	0	20
					0	11		0	Fibroma	Human Fib 9				s5_run26	0	11	0	0	11
hsa-bcm-miR-23	hairpin_23	Potential	Intron EPHB2	TGTTGCAAGTCGGTGGAGACG	5	5		0	Clear cell culture	RMG1 clear cell culture, confluent	1	22918565	22918709	s5_run17	5	5	0	0	5
hsa-bcm-miR-26	hairpin_26	Not likely	DNA repeat	ATGCCTAGACTGCACCCCAGACT	8	8		0	Clear cell culture	RMG1 clear cell culture, confluent	1	199456516	199456653	s5_run17	8	8	0	0	8
hsa-bcm-miR-21-3	hairpin_27	Potential	Intron BC058547	TGTGATATCATGGTTCCTGGGA	89	136		0	Clear cell culture	ES2 clear cell culture, subconfluent	-1	136882182	136882315	s3_run9	89	136	0	0	136
					10	10		0	ULMS	U4				s5_run29	10	10	0	0	10
hsa-bcm-miR-35	hairpin_35	High confidence	Intergenic	GAGCAATGTAGGTAGACTGTTT	0	13		0	Clear cell culture	OVISE clear cell culture, subconfluent	1	122586909	122587034	s5_run9	0	13	0	0	13
hsa-bcm-miR-39	hairpin_39	Confirmed	LINE	AGGGGACCAAAGAGATATATAG	0	9	ATATACCTGTTCGGTCTCTTT	0	SKN (Cell Line)	SKN	1	120378000	120378122	s5_run19	0	9	0	0	9
					12	32		5	Clear cell culture	OVMANA clear cell culture, confluent				s4_run17	12	32	0	5	37
					20	26		0	Clear cell culture	RMG1 clear cell culture, confluent				s5_run17	20	26	0	0	26
					13	32		0	Serous	Cell Line SKOV3				s8_run42	13	32	0	0	32
					5	17		0	Serous	Cell Line HEY				s7_run42	5	17	0	0	17
hsa-bcm-miR-43	hairpin_43	High confidence	Intergenic	TGTCCTCTAGGGCCTGCAGTCT	7	7		0	Clear cell culture	RMG1 clear cell culture, confluent	1	34061633	34061751	s5_run17	7	7	0	0	7
					5	5		0	Clear cell culture	SMOV2 clear cell culture, subconfluent				s6_run17	5	5	0	0	5
					11	11		0	Clear cell culture	A2780 clear cell culture, confluent				s2_run17	11	11	0	0	11
					7	7		0	Serous	Cell Line SKOV3				s8_run42	7	7	0	0	7
					6	6		0	Cyst wall	CW9				s2_run7	6	6	0	0	6
					11	11		0	Endometrioid	EC2				s5_run36	11	11	0	0	11
hsa-bcm-miR-46	hairpin_46	High confidence	CDH2	CGGGGAGAGAACGCAGTGACGT	12	12		0	NOSE cell culture	NOSE cell culture	1	91248611	91248727	s5_run10	12	12	0	0	12
					13	13		0	Clear cell culture	IGROV1 clear cell culture, confluent				s2_run10	13	13	0	0	13
					14	14		0	Clear cell culture	OVSAYO clear cell culture, confluent				s7_run17	14	14	0	0	14
					7	7		0	Clear cell culture	RMG1 clear cell culture, confluent				s5_run17	7	7	0	0	7
					6	6		0	Clear cell culture	SMOV2 clear cell culture, subconfluent				s6_run17	6	6	0	0	6
					9	9		0	Clear cell culture	A2780 clear cell culture, confluent				s2_run17	9	9	0	0	9
					7	7		0	NOSE cell culture	NOSE cell culture				s1_run10	7	7	0	0	7
					7	7		0	Clear cell culture	TOV21G clear cell culture, confluent				s2_run9	7	7	0	0	7
					7	7		0	Endometrium	EM30				s8_run19	7	7	0	0	7
					11	11		0	NOSE cell culture	NOSE cell culture				s4_run10	11	11	0	0	11
hsa-bcm-miR-47	hairpin_47	Potential	Intron SGIP1	ATAGGACTCATATAGTGCCAG	7	21		0	ULMS	U5	1	66866693	66866809	s4_run31	7	21	0	0	21
					28	28		0	Clear cell culture	TOV21G clear cell culture, confluent				s2_run9	28	28	0	0	28
					0	6		0	Endometrium	EM30				s8_run19	0	6	0	0	6
					5	5		0	Endometrium	EM32				s8_run21	5	5	0	0	5
hsa-bcm-miR-48	hairpin_48	High confidence	Intergenic	AGCGCGGGCTGAGCGCTGCCAGTC	11	11		0	Clear cell culture	A2780 clear cell culture, confluent	-1	92982149	92982263	s2_run17	11	11	0	0	11
hsa-bcm-miR-49	hairpin_49	Potential	U4 snRNA	TAGCCAATGAGGTTTATCCGAGGCG	10	10		0	Clear cell culture	OVMANA clear cell culture, confluent	-1	178851716	178851830	s4_run17	10	10	0	0	10
					6	6		0	Clear cell culture	SMOV2 clear cell culture, subconfluent				s6_run17	6	6	0	0	6
					9	9		0	Clear cell culture	A2780 clear cell culture, confluent				s2_run17	9	9	0	0	9
					5	5		0	Endometrioid	EC1				s8_run35	5	5	0	0	5
					6	6		0	Clear cell culture	OVISE clear cell culture, subconfluent				s5_run9	6	6	0	0	6
					13	13		0	Clear cell culture	OVTOKO clear cell culture, confluent				s2_run11	13	13	0	0	13
					7	7		0	Endometrioid	EC2				s5_run36	7	7	0	0	7
hsa-bcm-miR-52	hairpin_52	Not likely	snoRNA	TTTCTGTGTGGAATTTGAATATCTGAAA	159	211		0	Endometrium	EM18	1	72068774	72068884	s6_run14	159	211	0	0	211
					12	37		0	W. Proliferative	Human Fib 11				s8_run28	12	37	0	0	37
					8	8		0	Serous	Primary Human 15b				s6_run34	8	8	0	0	8
					20	20		0	NOSE cell culture	NOSE cell culture				s5_run10	20	20	0	0	20
					79	115		0	Clear cell culture	ES2 clear cell culture, subconfluent				s3_run9	79	115	0	0	115
					33	41		0	Clear cell culture	IGROV1 clear cell culture, confluent				s2_run10	33	41	0	0	41
					107	149		0	Endometrium	EM25				s7_run14	107	149	0	0	149
					9	18		0	Clear cell culture	RMG1 clear cell culture, confluent				s5_run17	9	18	0	0	18
					116	164		0	Serous	Primary Human 6-12-07				s6_run35	116	164	0	0	164
					14	30		0	ULMS	JH 750				s5_run40	14	30	0	0	30
					14	28		0	Serous	Primary Human 11-9-07				s8_run34	14	28	0	0	28
					72	91		0	Clear cell culture	OVISE clear cell culture, subconfluent				s5_run9	72	91	0	0	91
					17	17		0	Clear cell culture	OVAS clear cell culture, confluent				s3_run10	17	17	0	0	17
					215	289		0	Serous	Borderline Human 12				s5_run34	215	289	0	0	289
					37	52		0	Endometrium	EM12				s6_run10	37	52	0	0	52
					29	82		0	Secretory	Human Fib 7				s3_run19	29	82	0	0	82
					34	46		0	Clear cell culture	TOV21G clear cell culture, confluent				s2_run9	34	46	0	0	46
					8	24		0	Secretory	Human Myo 16				s7_run39	8	24	0	0	24
					8	19		0	Endometrium	EM4				s5_run18	8	19	0	0	19
					17	37		0	Endometrium	EM20				s6_run18	17	37	0	0	37
					7	14		0	Endometrium	EM32				s8_run21	7	14	0	0	14
					229	479		0	Serous	Primary Human 3-6-08				s7_run34	229	479	0	0	479
					7	21		0	Serous	Primary Human 9510				s6_run37	7	21	0	0	21
					6	15		0	Endometrioid	EC2				s5_run36	6	15	0	0	15
hsa-bcm-miR-53-1	hairpin_53	High confidence	ROR2/LINE	AAAGGCATAAAACCAAGACA	0	6		0	Secretory	Human Fib 16	1	93438354	93438464	s8_run39	0	6	0	0	6
					6	6		0	Secretory	Human Myo 14				s5_run45	6	6	0	0	6
					8	16		0	Proliferative	Human Myo 15				s5_run39	8	16	0	0	16
					8	20		0	ULMS	FM 146				s4_run40	8	20	0	0	20
					0	6		0	Endometrium	Endomet 1				s4_run7	0	6	0	0	6
					0	7		0	Proliferative	Human Myo 3				s6_run11	0	7	0	0	7
					5	11		0	Proliferative	Human Fib 15				s6_run39	5	11	0	0	11
					14	29		0	Cyst wall	CW9				s2_run7	14	29	0	0	29
					0	7		0	Secretory	Human Fib 13				s7_run29	0	7	0	0	7
					5	5		0	Endometrium	EM2				s5_run7	5	5	0	0	5
					5	5		0	Secretory	Human Myo 16				s7_run39	5	5	0	0	5
					10	22		0	Cyst wall	CW7				s7_run7	10	22	0	0	22
					12	12		0	Endometrium	Endomet 3				s6_run7	12	12	0	0	12
					5	12		0	Proliferative	Human Myo 17				s6_run40	5	12	0	0	12
hsa-bcm-miR-56	hairpin_56	Potential	SINE/LTR	GGGAGAAGGATCGAGACTGTCT	35	75		0	Clear cell culture	OVAS clear cell culture, confluent	1	95027948	95028057	s3_run10	35	75	0	0	75
hsa-bcm-miR-59	hairpin_59	Potential	LINE	AGATTGTTTCTTTTGCCGTGCA	22	34		0	ULMS	JH 775	1	110804346	110804454	s7_run31	22	34	0	0	34
hsa-bcm-miR-60	hairpin_60	High confidence	Intergenic	TGTGTGGATCCTGGAGGAGGCA	7	7		0	Clear cell culture	SMOV2 clear cell culture, subconfluent	-1	129492787	129492895	s6_run17	7	7	0	0	7
					10	10		0	Clear cell culture	OVISE clear cell culture, subconfluent				s5_run9	10	10	0	0	10
hsa-bcm-miR-61	hairpin_61	Not likely	28s rRNA	TAAGCAGGAGGTGTCAGAA	37	169		0	TLSMC (Cell Line)	TLSMC	1	134929535	134929643	s4_run19	37	169	0	0	169
hsa-bcm-miR-63	hairpin_63	Not likely	tRNA	AAGGGCTTAGCTTAATTAAAGTGGCTGA	6	44		0	Clear cell culture	OVAS clear cell culture, confluent	-1	5624	5731	s3_run10	6	44	0	0	44
hsa-bcm-miR-66	hairpin_66	Potential	3'UTR RAP11FIP4	AACTGAACCAGGAGTGAGCTTCG	5	5		0	Serous	Primary Human 15b	1	26886015	26886120	s6_run34	5	5	0	0	5
					11	11		0	Endometrioid	EC1				s8_run35	11	11	0	0	11
					9	15		0	Serous	Primary Human 9418				s8_run36	9	15	0	0	15
					12	24		0	Serous	Primary Human 9510				s6_run37	12	24	0	0	24
hsa-bcm-miR-70	hairpin_70	High confidence	Intergenic	TAACGCATAATATGGACATGT	7	7		0	Secretory	Human Fib 13	-1	170746265	170746369	s7_run29	7	7	0	0	7
					12	20		0	Cyst wall	CW7				s7_run7	12	20	0	0	20
hsa-bcm-miR-72	hairpin_72	High confidence	Intergenic	TTCTCAAGAGGGAGGCAATCAT	38	66		0	Serous	Primary Human 9418	-1	146139351	146139453	s8_run36	38	66	0	0	66
					87	153		0	Serous	Borderline Human 12				s5_run34	87	153	0	0	153
					28	39		0	Cyst wall	CW7				s7_run7	28	39	0	0	39
					11	23		0	Serous	Primary Human 9510				s6_run37	11	23	0	0	23
					11	26		0	Endometrioid	EC2				s5_run36	11	26	0	0	26
					27	45		0	Endometrioid	EC4				s7_run36	27	45	0	0	45
hsa-bcm-miR-74	hairpin_74	Potential	SINE	GAAGGAATTGTGGAGTAGTGGTT	7	12		0	Clear cell culture	OVSAYO clear cell culture, confluent	1	79505033	79505134	s7_run17	7	12	0	0	12
hsa-bcm-miR-75-1	hairpin_75	High confidence	Intergenic	TTTGGGACTGATCTTGATGTCT	11	20		0	W. Proliferative	Human Fib 11	-1	68264769	68264870	s8_run28	11	20	0	0	20
					6	11		0	Proliferative	Human Fib 17				s7_run40	6	11	0	0	11
					6	6		0	Cyst wall	CW7				s7_run7	6	6	0	0	6
					5	5		0	Secretory	Human Fib 12				s4_run29	5	5	0	0	5
hsa-bcm-miR-81	hairpin_81	Potential	LTR	AATGGTAGAAGATGGAACTAAC	5	5		0	Clear cell culture	OVMANA clear cell culture, confluent	-1	107027458	107027558	s4_run17	5	5	0	0	5
hsa-bcm-miR-75-2	hairpin_83	Potential	SINE/LTR	TTTGGGACTGATCTTGATGTCT	11	20		0	W. Proliferative	Human Fib 11	1	68264770	68264869	s8_run28	11	20	0	0	20
					6	11		0	Proliferative	Human Fib 17				s7_run40	6	11	0	0	11
					6	6		0	Cyst wall	CW7				s7_run7	6	6	0	0	6
					5	5		0	Secretory	Human Fib 12				s4_run29	5	5	0	0	5
hsa-bcm-miR-85	hairpin_85	Not likely	Intron DIP2C	ACAAGGAAGGACAAGAGGTGTGA	5	5		0	Clear cell culture	OVSAYO clear cell culture, confluent	-1	677624	677723	s7_run17	5	5	0	0	5
					7	7		0	ULMS	U5				s4_run31	7	7	0	0	7
					8	8		0	Clear cell culture	TOV21G clear cell culture, confluent				s2_run9	8	8	0	0	8
hsa-bcm-miR-90	hairpin_90	Potential	scRNA	CTCCCACTGCTTCACTTGACTAG	59	130		0	Serous	Primary Human 15b	-1	154407514	154407613	s6_run34	59	130	0	0	130
hsa-bcm-miR-92-1	hairpin_92	High confidence	Intron WBSCR17 +	AAGGAACCAGAAAATGAGAAGT	6	6		0	W. Proliferative	Human Fib 11	-1	70410594	70410692	s8_run28	6	6	0	0	6
					6	6		0	Fibroma	Human Fib 9				s5_run26	6	6	0	0	6
					6	6		0	Fibroma	Human Fib 9				s5_run26	6	6	0	0	6
hsa-bcm-miR-93	hairpin_93	Confirmed	Intergenic	CATCAGAATTCATGGAGGCTAGA	0	6	AGCTTCCATGACTCCTGATGGA	0	Serous	Cell Line HEY	-1	48332858	48332955	s7_run42	0	6	0	0	6
					0	5		0	Endometrioid	EC4				s7_run36	0	5	0	0	5
hsa-bcm-miR-94	hairpin_94	High confidence	Intergenic	TGAGGGACAGATGCCAGAAGCA	6	6		0	Cyst wall	CW9	1	69184307	69184404	s2_run7	6	6	0	0	6
					5	5		0	Endometrium	EM30				s8_run19	5	5	0	0	5
					5	5		0	Cyst wall	CW7				s7_run7	5	5	0	0	5
hsa-bcm-miR-96	hairpin_96	Not likely	Intergenic	TGGGGACACCAGTGCGGCTCAT	13	13		0	Clear cell culture	OVMANA clear cell culture, confluent	1	77116403	77116500	s4_run17	13	13	0	0	13
hsa-bcm-miR-97	hairpin_97	Not likely	SINE/LINE	TGGGTGACACAGCGAGACTCTGTAT	6	6		0	Clear cell culture	ES2 clear cell culture, subconfluent	-1	56990003	56990099	s3_run9	6	6	0	0	6
hsa-bcm-miR-99	hairpin_99	High confidence	Intron DMD	TTGAGGAAAAGATGGTCTTATT	12	17		0	Clear cell culture	A2780 clear cell culture, confluent	-1	32511694	32511790	s2_run17	12	17	0	0	17
hsa-bcm-miR-102	hairpin_102	Not likely	SINE	AAGTGTGGGCTCTGATTGGCAGA	5	5		0	Cyst wall	ENDO M1	-1	62962921	62963016	s8_run17	5	5	0	0	5
hsa-bcm-miR-106	hairpin_106	Potential	DNA repeat	TAGTGAGTTAGAGATGCAGAGC	5	5		0	Endometrioid	EC1	1	88350987	88351082	s8_run35	5	5	0	0	5
hsa-bcm-miR-108	hairpin_108	High confidence	Intergenic	CGGCGGGGACGGCGATTGGTC	6	6		0	Clear cell culture	A2780 clear cell culture, confluent	-1	61339205	61339300	s2_run17	6	6	0	0	6
hsa-bcm-miR-92-2	hairpin_109	High confidence	Intron WBSCR17 -	AAGGAACCAGAAAATGAGAAGT	6	6		0	W. Proliferative	Human Fib 11	1	70410596	70410690	s8_run28	6	6	0	0	6
hsa-bcm-miR-110	hairpin_110	Not likely	No match	ATTGAATTTTTGTTTGTGACCTG	7	7		0	ULMS	FM 146	-1	161601656	161601749	s4_run40	7	7	0	0	7
hsa-bcm-miR-111	hairpin_111	High confidence	Intergenic	AGCTTTTGGGAATTCAGGTAG	6	6		0	Clear cell culture	OVMANA clear cell culture, confluent	-1	153629927	153630020	s4_run17	6	6	0	0	6
					9	9		0	Clear cell culture	A2780 clear cell culture, confluent				s2_run17	9	9	0	0	9
					6	6		0	Clear cell culture	OVISE clear cell culture, subconfluent				s5_run9	6	6	0	0	6
					6	6		0	Clear cell culture	TOV21G clear cell culture, confluent				s2_run9	6	6	0	0	6
hsa-bcm-miR-112	hairpin_112	Not likely	SSU-rRNA	TGGATGGTTTAGTGAGG	0	20		0	W. Proliferative	Human Fib 11	1	10646564	10646657	s8_run28	0	20	0	0	20
					0	23		0	Proliferative	Human Fib 17				s7_run40	0	23	0	0	23
					25	145		11	ULMS	U4				s5_run29	25	145	0	11	156
					0	53		0	ULMS	U7				s6_run29	0	53	0	0	53
hsa-bcm-miR-113	hairpin_113	High confidence	Intergenic	AAGAGGAAGAAATGGCTGGTTCTCAG	6	6		0	Clear cell culture	IGROV1 clear cell culture, confluent	-1	245431892	245431985	s2_run10	6	6	0	0	6
hsa-bcm-miR-115	hairpin_115	Not likely	18s rRNA	CGCCTGGATACCGCAGCTAGGA	5	5		0	Serous	Primary Human 15b	1	33870766	33870858	s6_run34	5	5	0	0	5
hsa-bcm-miR-116	hairpin_116	Not likely	Intergenic	AGGGAGAAGAGCTTTAATGCT	0	5		0	Cyst wall	ENDO M1	-1	152899736	152899828	s8_run17	0	5	0	0	5
hsa-bcm-miR-117	hairpin_117	Not likely	tRNA	CAGAGTGGGGTTTTGCA	7	21		0	Clear cell culture	RMG1 clear cell culture, confluent	1	32024045	32024137	s5_run17	7	21	0	0	21
					0	11		0	Serous	Cell Line SKOV3				s8_run42	0	11	0	0	11
hsa-bcm-miR-118	hairpin_118	High confidence	Intergenic	AGGATTTCAGAAATACTGGTGT	14	14		0	SKN (Cell Line)	SKN	-1	126363560	126363652	s5_run19	14	14	0	0	14
					7	7		0	NOSE cell culture	NOSE cell culture				s5_run10	7	7	0	0	7
					6	6		0	NOSE cell culture	NOSE cell culture				s1_run10	6	6	0	0	6
hsa-bcm-miR-120	hairpin_120	High confidence	Intergenic	GCTCGGACTGAGCAGGTGGG	6	6		0	W. Proliferative	Human Fib 11	-1	26105440	26105532	s8_run28	6	6	0	0	6
					6	6		0	SKN (Cell Line)	SKN				s5_run19	6	6	0	0	6
					6	6		0	Clear cell culture	A2780 clear cell culture, confluent				s2_run17	6	6	0	0	6
					5	5		0	Secretory	Human Myo 12				s8_run30	5	5	0	0	5
					7	7		0	Secretory	Human Fib 8				s7_run23	7	7	0	0	7
					8	8		0	Secretory	Human Fib 7				s3_run19	8	8	0	0	8
					6	6		0	Cyst wall	CW7				s7_run7	6	6	0	0	6
					12	12		0	Fibroma	Human Fib 9				s5_run26	12	12	0	0	12
hsa-bcm-miR-122	hairpin_122	High confidence	Intergenic	ACAGGGCCGCAGATGGAGACT	5	5		0	Clear cell culture	RMG1 clear cell culture, confluent	-1	159105681	159105773	s5_run17	5	5	0	0	5
hsa-bcm-miR-123	hairpin_123	Potential	Intron MICALCL	GCAGGAAGAGACGCAGCAGCTTG	6	6		0	Clear cell culture	OVMANA clear cell culture, confluent	1	12299619	12299710	s4_run17	6	6	0	0	6
					9	9		0	Clear cell culture	OVISE clear cell culture, subconfluent				s5_run9	9	9	0	0	9
hsa-bcm-miR-125	hairpin_125	Potential	DNA repeat	TGTGACTTTAAGGGAAATGGCG	7	7		0	Clear cell culture	OVMANA clear cell culture, confluent	1	68607215	68607306	s4_run17	7	7	0	0	7
					28	28		0	Clear cell culture	ES2 clear cell culture, subconfluent				s3_run9	28	28	0	0	28
					7	7		0	ULMS	FM 146				s4_run40	7	7	0	0	7
					15	15		0	Clear cell culture	A2780 clear cell culture, confluent				s2_run17	15	15	0	0	15
					6	6		0	ULMS	U5				s4_run31	6	6	0	0	6
					6	6		0	ULMS	JH 750				s5_run40	6	6	0	0	6
					10	10		0	Secretory	Human Fib 8				s7_run23	10	10	0	0	10
hsa-bcm-miR-127	hairpin_127	High confidence	Intergenic	TTTGTATGGATATGTGTGTGTAT	6	6		0	ULMS	U4	-1	78041555	78041645	s5_run29	6	6	0	0	6
hsa-bcm-miR-131	hairpin_131	Potential	LTR	TGGCAGTCAGGATTGTTATGTT	5	5		0	W. Proliferative	Human Myo 11	1	32529983	32530072	s3_run29	5	5	0	0	5
					9	9		0	ULMS	U7				s6_run29	9	9	0	0	9
hsa-bcm-miR-132	hairpin_132	Confirmed	Intron OSBP2	CACCTTGCGCTACTCAGGTCTGC	70	75	AATCTGAGAAGGCGCACAAGGTT	44	Serous	Primary Human 15b	1	29457541	29457630	s6_run34	70	75	0	44	119
					0	0		8	Clear cell culture	ES2 clear cell culture, subconfluent				s3_run9	0	0	0	8	8
					0	0		6	Clear cell culture	IGROV1 clear cell culture, confluent				s2_run10	0	0	0	6	6
					0	0		7	Cyst wall	M4				s7_run10	0	0	0	7	7
					0	0		7	Clear cell culture	OVAS clear cell culture, confluent				s3_run10	0	0	0	7	7
					7	7		6	Serous	Primary Human 11888				s8_run37	7	7	0	6	13
					0	0		11	Clear cell culture	TOV21G clear cell culture, confluent				s2_run9	0	0	0	11	11
hsa-bcm-miR-135	hairpin_135	High confidence	Intron SCHIP1	GCAGAGAACAAAGGACTCAGT	63	95		0	Clear cell culture	ES2 clear cell culture, subconfluent	1	160483129	160483217	s3_run9	71	103	0	0	103
					33	33		0	Serous	Cell Line HEY				s7_run42	33	33	0	0	33
hsa-bcm-miR-138	hairpin_138	Not likely	Intergenic	TAAGGGGTGTATGGCAGATGCA	12	12		0	Clear cell culture	OVMANA clear cell culture, confluent	-1	131729092	131729180	s4_run17	12	12	0	0	12
					5	5		0	Clear cell culture	OVSAYO clear cell culture, confluent				s7_run17	5	5	0	0	5
hsa-bcm-miR-139	hairpin_139	Potential	Intron TESK1	ACTGGGGAGCAGAAGGAGAAC	5	5		0	Clear cell culture	OVSAYO clear cell culture, confluent	1	35598079	35598167	s7_run17	5	5	0	0	5
hsa-bcm-miR-142-1	hairpin_142	High confidence	Intron RP11-529I10.4 +	AAGGGCTTCCTCTCTGCAGGA	0	5		0	W. Proliferative	Human Fib 11	1	103351160	103351248	s8_run28	0	5	0	0	5
					6	16		0	SKN (Cell Line)	SKN				s5_run19	6	16	0	0	16
					5	5		0	Clear cell culture	OVMANA clear cell culture, confluent				s4_run17	5	5	0	0	5
					0	10		0	Clear cell culture	ES2 clear cell culture, subconfluent				s3_run9	0	10	0	0	10
					19	32		0	Clear cell culture	A2780 clear cell culture, confluent				s2_run17	19	32	0	0	32
					7	7		0	Endometrium	Endomet 1				s4_run7	7	7	0	0	7
					8	8		0	Cyst wall	CW9				s2_run7	8	8	0	0	8
					0	6		0	Clear cell culture	OVAS clear cell culture, confluent				s3_run10	0	6	0	0	6
					0	8		0	Clear cell culture	OVTOKO clear cell culture, confluent				s2_run11	0	8	0	0	8
					6	12		0	Endometrium	EM24				s7_run18	6	12	0	0	12
					5	5		0	Clear cell culture	KK clear cell culture, confluent				s3_run17	5	5	0	0	5
					6	6		0	NOSE cell culture	NOSE cell culture				s5_run10	6	6	0	0	6
					0	8		0	Clear cell culture	IGROV1 clear cell culture, confluent				s2_run10	0	8	0	0	8
					6	14		0	Clear cell culture	OVSAYO clear cell culture, confluent				s7_run17	6	14	0	0	14
					10	17		0	Clear cell culture	RMG1 clear cell culture, confluent				s5_run17	10	17	0	0	17
					7	7		0	Clear cell culture	SMOV2 clear cell culture, subconfluent				s6_run17	7	7	0	0	7
					0	9		0	Endometrioid	EC1				s8_run35	0	9	0	0	9
					0	8		0	Clear cell culture	OVISE clear cell culture, subconfluent				s5_run9	0	8	0	0	8
					7	17		0	Serous	Primary Human 9418				s8_run36	7	17	0	0	17
					0	8		0	Serous	Borderline Human 12				s5_run34	0	8	0	0	8
					0	8		0	Proliferative	Human Fib 17				s7_run40	0	8	0	0	8
					0	8		0	Clear cell culture	TOV21G clear cell culture, confluent				s2_run9	0	8	0	0	8
					9	14		0	Endometrium	EM30				s8_run19	9	14	0	0	14
hsa-bcm-miR-142-2	hairpin_143	High confidence	Intron RP11-529I10.4 -	AAGGGCTTCCTCTCTGCAGGA	0	5		0	W. Proliferative	Human Fib 11	-1	103351160	103351248	s8_run28	0	5	0	0	5
					6	16		0	SKN (Cell Line)	SKN				s5_run19	6	16	0	0	16
					5	5		0	Clear cell culture	OVMANA clear cell culture, confluent				s4_run17	5	5	0	0	5
					0	10		0	Clear cell culture	ES2 clear cell culture, subconfluent				s3_run9	0	10	0	0	10
					19	32		0	Clear cell culture	A2780 clear cell culture, confluent				s2_run17	19	32	0	0	32
					7	7		0	Endometrium	Endomet 1				s4_run7	7	7	0	0	7
					8	8		0	Cyst wall	CW9				s2_run7	8	8	0	0	8
					0	6		0	Clear cell culture	OVAS clear cell culture, confluent				s3_run10	0	6	0	0	6
					0	8		0	Clear cell culture	OVTOKO clear cell culture, confluent				s2_run11	0	8	0	0	8
					6	12		0	Endometrium	EM24				s7_run18	6	12	0	0	12
					5	5		0	Clear cell culture	KK clear cell culture, confluent				s3_run17	5	5	0	0	5
					6	6		0	NOSE cell culture	NOSE cell culture				s5_run10	6	6	0	0	6
					0	8		0	Clear cell culture	IGROV1 clear cell culture, confluent				s2_run10	0	8	0	0	8
					6	14		0	Clear cell culture	OVSAYO clear cell culture, confluent				s7_run17	6	14	0	0	14
					10	17		0	Clear cell culture	RMG1 clear cell culture, confluent				s5_run17	10	17	0	0	17
					7	7		0	Clear cell culture	SMOV2 clear cell culture, subconfluent				s6_run17	7	7	0	0	7
					0	9		0	Endometrioid	EC1				s8_run35	0	9	0	0	9
					7	17		0	Serous	Primary Human 9418				s8_run36	7	17	0	0	17
					0	8		0	Clear cell culture	OVISE clear cell culture, subconfluent				s5_run9	0	8	0	0	8
					0	8		0	Proliferative	Human Fib 17				s7_run40	0	8	0	0	8
					0	8		0	Serous	Borderline Human 12				s5_run34	0	8	0	0	8
					0	8		0	Clear cell culture	TOV21G clear cell culture, confluent				s2_run9	0	8	0	0	8
					9	14		0	Endometrium	EM30				s8_run19	9	14	0	0	14
hsa-bcm-miR-148	hairpin_148	Not likely	tRNA	GTAGTCGTGGCCGAGTGG	60	282		0	Clear cell culture	OVMANA clear cell culture, confluent	-1	27629220	27629307	s4_run17	60	282	0	0	282
					283	1085		0	Clear cell culture	A2780 clear cell culture, confluent				s2_run17	283	1085	0	0	1093
					64	232		0	Serous	Primary Human 15b				s6_run34	64	232	0	0	232
hsa-bcm-miR-150	hairpin_150	High confidence	SINE	GGCGACAAAACGAGACCCTGT	5	5		0	SKN (Cell Line)	SKN	1	155216181	155216267	s5_run19	5	5	0	0	5
					7	7		0	Clear cell culture	ES2 clear cell culture, subconfluent				s3_run9	7	7	0	0	7
					10	10		0	Clear cell culture	A2780 clear cell culture, confluent				s2_run17	10	10	0	0	10
					6	6		0	Secretory	Human Myo 12				s8_run30	6	6	0	0	6
					6	6		0	Clear cell culture	IGROV1 clear cell culture, confluent				s2_run10	6	6	0	0	6
					7	7		0	Clear cell culture	RMG1 clear cell culture, confluent				s5_run17	7	7	0	0	7
					6	6		0	Clear cell culture	OVISE clear cell culture, subconfluent				s5_run9	6	6	0	0	6
					7	7		0	Fibroma	Human Fib 9				s5_run26	7	7	0	0	7
hsa-bcm-miR-155	hairpin_155	Potential	scRNA	GGCTGGTCCGAGTGCAGTGGT	223	994		0	Secretory	Human Myo 8	-1	3192675	3192761	s6_run23	223	994	0	0	994
hsa-bcm-miR-156	hairpin_156	Potential	hsa-mir-1468	CTCCGTTTGCCTGTTTCGCTGA	9	17		0	W. Proliferative	Human Fib 11	-1	62922607	62922692	s8_run28	9	17	0	0	17
					9	14		0	Clear cell culture	A2780 clear cell culture, confluent				s2_run17	9	14	0	0	14
					0	5		0	Secretory	Human Myo 12				s8_run30	0	5	0	0	5
					5	5		0	Clear cell culture	SMOV2 clear cell culture, subconfluent				s6_run17	5	5	0	0	5
					6	6		0	Clear cell culture	OVISE clear cell culture, subconfluent				s5_run9	6	6	0	0	6
					8	8		0	Clear cell culture	TOV21G clear cell culture, confluent				s2_run9	8	8	0	0	8
					5	5		0	Fibroma	Human Fib 9				s5_run26	5	5	0	0	5
hsa-bcm-miR-157	hairpin_157	Potential	LINE	ACAGGAGTGGGGGTGGGACATA	0	5		0	Fibroma	Human Fib 9	1	64421395	64421480	s5_run26	0	5	0	0	5
hsa-bcm-miR-158	hairpin_158	High confidence	Intergenic	TGAGGAGATCGTCGAGGTTGG	6	6		0	Serous	Primary Human 6-12-07	-1	96154315	96154400	s6_run35	6	6	0	0	6
hsa-bcm-miR-159	hairpin_159	High confidence	Intron TRPC6	ACTGATTATCTTAACTCTCTGA	5	5		0	Clear cell culture	OVMANA clear cell culture, confluent	-1	100895761	100895846	s4_run17	5	5	0	0	5
hsa-bcm-miR-160	hairpin_160	High confidence	LINE	TCTCTGAGTACCATATGCCTTGT	5	5		0	ULMS	U7	-1	101165848	101165932	s6_run29	5	5	0	0	5
hsa-bcm-miR-162	hairpin_162	Potential	Intron ODZ2	TCACCTGGCATAAGCAATTCACA	5	10		0	Clear cell culture	OVMANA clear cell culture, confluent	1	167525428	167525512	s4_run17	5	10	0	0	10
					6	6		0	Clear cell culture	OVTOKO clear cell culture, confluent				s2_run11	6	6	0	0	6
hsa-bcm-miR-164	hairpin_164	High confidence	Intergenic	AGAAGGGGTGAAATTTAAACGT	5	5		0	Clear cell culture	OVMANA clear cell culture, confluent	1	14902866	14902949	s4_run17	5	5	0	0	5
					16	21		0	Clear cell culture	A2780 clear cell culture, confluent	-1	18413252	18413335	s2_run17	16	21	0	0	21
					14	14		0	Clear cell culture	RMG1 clear cell culture, confluent				s5_run17	14	14	0	0	14
					12	26		0	Clear cell culture	OVISE clear cell culture, subconfluent				s5_run9	12	26	0	0	26
					20	20		0	Endometrioid	EC2				s5_run36	20	20	0	0	20
					5	5		0	Fibroma	Human Fib 9				s5_run26	5	5	0	0	5
hsa-bcm-miR-165	hairpin_165	Potential	Intron TMF1	CTGACTGAATAGGTAGGGTCAT	7	7		0	Clear cell culture	OVTOKO clear cell culture, confluent	-1	69180796	69180879	s2_run11	7	7	0	0	7
					6	6		0	Serous	Primary Human 15b				s6_run34	6	6	0	0	6
					6	6		0	Secretory	Human Myo 14				s5_run45	6	6	0	0	6
					6	6		0	Clear cell culture	TOV21G clear cell culture, confluent				s2_run9	6	6	0	0	6
					7	7		0	Endometrioid	EC2				s5_run36	7	7	0	0	7
hsa-bcm-miR-166	hairpin_166	Not likely	DNA repeat	TCTCAGGAGTAAAGACAGAGTT	10	20		0	Clear cell culture	OVMANA clear cell culture, confluent	-1	70396030	70396113	s4_run17	10	20	0	0	20
					9	23		0	Clear cell culture	ES2 clear cell culture, subconfluent				s3_run9	9	23	0	0	23
					16	29		0	Clear cell culture	OVAS clear cell culture, confluent				s3_run10	16	29	0	0	29
					5	5		0	Clear cell culture	OVSAYO clear cell culture, confluent				s7_run17	5	5	0	0	5
					31	71		0	Clear cell culture	RMG1 clear cell culture, confluent				s5_run17	31	71	0	0	71
					6	6		0	Endometrioid	EC1				s8_run35	6	6	0	0	6
					6	6		0	Clear cell culture	OVISE clear cell culture, subconfluent				s5_run9	6	6	0	0	6
					7	16		0	Clear cell culture	TOV21G clear cell culture, confluent				s2_run9	7	16	0	0	16
					15	27		0	Endometrioid	EC2				s5_run36	15	27	0	0	27
					5	5		0	Endometrioid	EC4				s7_run36	5	5	0	0	5
hsa-bcm-miR-167	hairpin_167	High confidence	Intergenic	TCTGGCCTTGACTTGACTCTTT	5	5		0	Clear cell culture	RMG1 clear cell culture, confluent	1	103509541	103509624	s5_run17	5	5	0	0	5
hsa-bcm-miR-171	hairpin_171	High confidence	LTR	AACTAGTAATGTTGGATTAGGG	193	235		0	Clear cell culture	A2780 clear cell culture, confluent	1	79639727	79639809	s2_run17	193	235	0	0	235
hsa-bcm-miR-172	hairpin_172	High confidence	Intergenic	TGCCTGGAACATAGTAGGGACT	5	5		0	Clear cell culture	OVMANA clear cell culture, confluent	-1	62317042	62317124	s4_run17	5	5	0	0	5
					5	5		0	Clear cell culture	A2780 clear cell culture, confluent				s2_run17	5	5	0	0	5
					6	6		0	Serous	Cell Line SKOV3				s8_run42	6	6	0	0	6
					10	10		0	Clear cell culture	OVAS clear cell culture, confluent				s3_run10	10	10	0	0	10
					8	8		0	Clear cell culture	IGROV1 clear cell culture, confluent				s2_run10	8	8	0	0	8
					15	15		0	Clear cell culture	OVSAYO clear cell culture, confluent				s7_run17	15	15	0	0	15
					23	23		0	Clear cell culture	RMG1 clear cell culture, confluent				s5_run17	23	23	0	0	23
					10	10		0	Clear cell culture	OVISE clear cell culture, subconfluent				s5_run9	10	10	0	0	10
					7	7		0	Endometrioid	EC2				s5_run36	7	7	0	0	7
hsa-bcm-miR-173	hairpin_173	Not likely	Intron UBAP2L	AAATTGCACAACTCTCACATTC	5	5		0	Endometrioid	EC1	1	152498886	152498968	s8_run35	5	5	0	0	5
					5	5		0	Endometrioid	EC2				s5_run36	5	5	0	0	5
hsa-bcm-miR-175	hairpin_175	Not likely	Intron UBAP2L	CCTGTCTGAGCGTCGCT	293	440		0	Cyst wall	CW19	1	33873009	33873091	s3_run18	293	440	0	0	445
					199	313		0	Cyst wall	CW7				s7_run7	199	313	0	0	468
hsa-bcm-miR-176	hairpin_176	Potential	Intron NPC1	AAGTTCCATAATTCTCTGGCTGT	6	6		0	Clear cell culture	OVSAYO clear cell culture, confluent	-1	19395846	19395927	s7_run17	6	6	0	0	6
hsa-bcm-miR-179	hairpin_179	Potential	Intergenic	CAGTGCCTGTAGAAGCATTTGT	12	17		0	Clear cell culture	OVSAYO clear cell culture, confluent	-1	37565668	37565749	s7_run17	12	17	0	0	17
hsa-bcm-miR-180	hairpin_180	Potential	Intron POLR3F	TCTGGGAGGTTGTAGCAGTGGA	0	5		0	Clear cell culture	OVSAYO clear cell culture, confluent	1	18399255	18399336	s7_run17	0	5	0	0	5
hsa-bcm-miR-181	hairpin_181	Potential	Intergenic	TTGGCCATGGGGCTGCGCGGGGC	0	5		0	Cyst wall	CW7	1	764578	764659	s7_run7	0	5	0	0	5
hsa-bcm-miR-182	hairpin_182	Potential	SINE	TGTTGGGATTCAGCAGGACCAT	12	22		0	TLSMC (Cell Line)	TLSMC	1	25222582	25222663	s4_run19	12	22	0	0	22
					12	12		0	ULMS	U5				s4_run31	12	12	0	0	12
hsa-bcm-miR-185	hairpin_185	Potential	Intron BAALC	GGTGGGGCAATGGGATCAGGT	6	11		0	Clear cell culture	OVMANA clear cell culture, confluent	1	104236015	104236096	s4_run17	6	11	0	0	11
hsa-bcm-miR-53-2	hairpin_187	High confidence	LINE	AAAGGCATAAAACCAAGACA	0	6		0	Secretory	Human Fib 16	-1	93438367	93438448	s8_run39	0	6	0	0	6
					8	20		0	ULMS	FM 146				s4_run40	8	20	0	0	20
					0	6		0	Endometrium	Endomet 1				s4_run7	0	6	0	0	6
					0	7		0	Proliferative	Human Myo 3				s6_run11	0	7	0	0	7
					5	11		0	Proliferative	Human Fib 15				s6_run39	5	11	0	0	11
					14	29		0	Cyst wall	CW9				s2_run7	14	29	0	0	29
					0	7		0	Secretory	Human Fib 13				s7_run29	0	7	0	0	7
					5	5		0	Endometrium	EM2				s5_run7	5	5	0	0	5
					5	5		0	Secretory	Human Myo 16				s7_run39	5	5	0	0	5
					12	12		0	Endometrium	Endomet 3				s6_run7	12	12	0	0	12
					6	6		0	Secretory	Human Myo 14				s5_run45	6	6	0	0	6
					8	16		0	Proliferative	Human Myo 15				s5_run39	8	16	0	0	16
					10	22		0	Cyst wall	CW7				s7_run7	10	22	0	0	22
					5	12		0	Proliferative	Human Myo 17				s6_run40	5	12	0	0	12
hsa-bcm-miR-189	hairpin_189	High confidence	Intergenic	AGATGTATGGAATCTGTATAT	8	8		0	Serous	Primary Human 16399	-1	27172246	27172327	s7_run37	8	8	0	0	8
					7	7		0	Serous	Cell Line SKOV3				s8_run42	7	7	0	0	7
hsa-bcm-miR-190	hairpin_190	Confirmed	Intergenic	TAGTCCCTTCCTTGAAGCGGTC	0	0	CGAGCCTCAAGCAAGGGACTTCA	11	Cyst wall	CW2	1	149146896	149146977	s7_run21	0	0	0	11	11
					5	5		34	Serous	Primary Human 15b				s6_run34	5	5	23	34	39
					0	0		6	Secretory	Human Myo 8				s6_run23	0	0	6	6	6
					36	91		18	Cyst wall	CW7				s7_run7	36	91	13	18	109
hsa-bcm-miR-191	hairpin_191	High confidence	Intergenic	ATATGTATATGTGACTGCTACT	8	8		0	Clear cell culture	OVTOKO clear cell culture, confluent	-1	58734245	58734325	s2_run11	8	8	0	0	8
hsa-bcm-miR-192	hairpin_192	High confidence	Simple repeat	ATCATGTATGATACTGCAAACA	8	8		0	Serous	Primary Human 9510	1	72597094	72597174	s6_run37	8	8	0	0	8
					11	11		0	Serous	Primary Human 15b				s6_run34	11	11	0	0	11
					7	7		0	Clear cell culture	OVSAYO clear cell culture, confluent				s7_run17	7	7	0	0	7
hsa-bcm-miR-193	hairpin_193	Potential	Intergenic	GACCGAGAGGGCCTCGGCTGT	9	9		0	Serous	Primary Human 15b	1	24741800	24741880	s6_run34	9	9	0	0	9
hsa-bcm-miR-195	hairpin_195	Potential	Intron ABCA6	AGCAGCATGAACCTGTCTCA	5	5		0	Cyst wall	ENDO M1	-1	64607295	64607374	s8_run17	5	5	0	0	5
hsa-bcm-miR-196	hairpin_196	Potential	3' UTR SLC35B2	GAAGATGGTGCTGTGCTGAGGAA	0	5		0	Cyst wall	ENDO M1	-1	44329921	44330000	s8_run17	0	5	0	0	5
hsa-bcm-miR-198	hairpin_198	Potential	Intron SIDT1	CAGGGCTGGCAGTGACATGGGT	5	5		0	Endometrium	EM2	1	114796407	114796486	s5_run7	5	5	0	0	5
					12	12		0	Endometrium	EM30				s8_run19	12	12	0	0	12
hsa-bcm-miR-203	hairpin_203	High confidence	Intergenic	ACAGTGAGGTAGAGGGAGTGC	5	5		0	Clear cell culture	OVMANA clear cell culture, confluent	-1	9689335	9689412	s4_run17	5	5	0	0	5
					8	8		0	Clear cell culture	A2780 clear cell culture, confluent				s2_run17	8	8	0	0	8
					5	5		0	Serous	Cell Line SKOV3				s8_run42	5	5	0	0	5
					5	5		0	Clear cell culture	OVSAYO clear cell culture, confluent				s7_run17	5	5	0	0	5
					5	5		0	Clear cell culture	RMG1 clear cell culture, confluent				s5_run17	5	5	0	0	5
hsa-bcm-miR-204	hairpin_204	High confidence	Intron AK094607	CAGGCAGTGACTGTTCAGACGTC	37	37		0	SKN (Cell Line)	SKN	-1	98283407	98283484	s5_run19	37	37	0	0	37
					31	31		0	Clear cell culture	ES2 clear cell culture, subconfluent				s3_run9	31	31	0	0	31
					213	320		0	Clear cell culture	A2780 clear cell culture, confluent				s2_run17	213	320	0	0	320
					0	6		0	Proliferative	Human Fib 15				s6_run39	0	6	0	0	6
					7	14		0	ULMS	U7				s6_run29	7	14	0	0	14
					0	6		0	Endometrium	Endomet 3				s6_run7	0	6	0	0	6
					0	8		0	Secretory	Human Fib 10				s6_run21	0	8	0	0	8
					44	77		0	Clear cell culture	OVSAYO clear cell culture, confluent				s7_run17	44	77	0	0	77
					5	5		0	Proliferative	Human Fib 17				s7_run40	5	5	0	0	5
					7	19		0	ULMS	U4				s5_run29	7	19	0	0	19
					5	10		0	ULMS	JH 855				s8_run31	5	10	0	0	10
					21	28		0	Secretory	Human Fib 7				s3_run19	21	28	0	0	28
					6	6		0	Clear cell culture	TOV21G clear cell culture, confluent				s2_run9	6	6	0	0	6
					6	6		0	Cyst wall	ENDO M1				s8_run17	6	6	0	0	6
					14	21		0	Serous	Cell Line HEY				s7_run42	14	21	0	0	21
					6	6		0	Secretory	Human Fib 12				s4_run29	6	6	0	0	6
					22	22		0	NOSE cell culture	NOSE cell culture				s4_run10	22	22	0	0	22
hsa-bcm-miR-206	hairpin_206	Potential	Intergenic	TGGCAAACGTGGAAGCCGAGA	5	5		0	Clear cell culture	OVSAYO clear cell culture, confluent	1	62789898	62789975	s7_run17	5	5	0	0	5
hsa-bcm-miR-207	hairpin_207	Not likely	SINE	TCTGAGACTAGAGCAAAGCCCTT	5	5		0	Clear cell culture	OVSAYO clear cell culture, confluent	1	234136664	234136741	s7_run17	5	5	0	0	5
hsa-bcm-miR-210-1	hairpin_210	High confidence	Intron FASTKD2 +	GCTGCACCGGAGACTGGGTAA	10	10		0	SKN (Cell Line)	SKN	1	207356202	207356278	s5_run19	10	10	0	0	10
					8	8		0	Serous	Primary Human 16399				s7_run37	8	8	0	0	8
					12	12		0	Clear cell culture	OVMANA clear cell culture, confluent				s4_run17	12	12	0	0	12
					7	7		0	Clear cell culture	ES2 clear cell culture, subconfluent				s3_run9	7	7	0	0	7
					6	6		0	Clear cell culture	A2780 clear cell culture, confluent				s2_run17	6	6	0	0	6
					12	12		0	Serous	Cell Line SKOV3				s8_run42	12	12	0	0	12
					8	8		0	Serous	Primary Human 15b				s6_run34	8	8	0	0	8
					7	7		0	NOSE cell culture	NOSE cell culture				s5_run10	7	7	0	0	7
					6	6		0	Clear cell culture	RMG1 clear cell culture, confluent				s5_run17	6	6	0	0	6
					6	6		0	Clear cell culture	SMOV2 clear cell culture, subconfluent				s6_run17	6	6	0	0	6
					9	9		0	Cyst wall	M4				s7_run10	9	9	0	0	9
					6	6		0	Serous	Borderline Human 12				s5_run34	6	6	0	0	6
					8	8		0	NOSE cell culture	NOSE cell culture				s1_run10	8	8	0	0	8
					7	7		0	Cyst wall	ENDO M1				s8_run17	7	7	0	0	7
hsa-bcm-miR-211	hairpin_211	Not likely	Intergenic	GATGCCTGGGAGTTGCGATCTGC	5	5		0	ULMS	FM 146	1	41341273	41341349	s4_run40	5	5	0	0	5
hsa-bcm-miR-212	hairpin_212	High confidence	Intergenic	AAGAGAACTGAAAGTGGAGCCT	5	5		0	Endometrioid	EC1	-1	36698191	36698267	s8_run35	5	5	0	0	5
hsa-bcm-miR-215	hairpin_215	High confidence	Intron COL5a2	GCAGTAGTGTAGAGATTGGTT	9	14		0	SKN (Cell Line)	SKN	-1	189706007	189706082	s5_run19	9	14	0	0	14
					8	8		0	Clear cell culture	ES2 clear cell culture, subconfluent				s3_run9	8	8	0	0	8
					5	5		0	Clear cell culture	A2780 clear cell culture, confluent				s2_run17	5	5	0	0	5
					0	6		0	Proliferative	Human Fib 1				s5_run11	0	6	0	0	6
					18	24		0	Cyst wall	CW9				s2_run7	18	24	0	0	24
					8	8		0	Endometrium	EM2				s5_run7	8	8	0	0	8
					8	21		0	Cyst wall	M4				s7_run10	8	21	0	0	21
					6	6		0	Secretory	Human Fib 7				s3_run19	6	6	0	0	6
					0	5		0	Proliferative	Human Myo 17				s6_run40	0	5	0	0	5
hsa-bcm-miR-210-2	hairpin_216	High confidence	Intron FASTKD2 -	GCTGCACCGGAGACTGGGTAA	10	10		0	SKN (Cell Line)	SKN	-1	207356203	207356277	s5_run19	10	10	0	0	10
					8	8		0	Serous	Primary Human 16399				s7_run37	8	8	0	0	8
					12	12		0	Clear cell culture	OVMANA clear cell culture, confluent				s4_run17	12	12	0	0	12
					7	7		0	Clear cell culture	ES2 clear cell culture, subconfluent				s3_run9	7	7	0	0	7
					6	6		0	Clear cell culture	A2780 clear cell culture, confluent				s2_run17	6	6	0	0	6
					12	12		0	Serous	Cell Line SKOV3				s8_run42	12	12	0	0	12
					8	8		0	Serous	Primary Human 15b				s6_run34	8	8	0	0	8
					7	7		0	NOSE cell culture	NOSE cell culture				s5_run10	7	7	0	0	7
					6	6		0	Clear cell culture	RMG1 clear cell culture, confluent				s5_run17	6	6	0	0	6
					6	6		0	Clear cell culture	SMOV2 clear cell culture, subconfluent				s6_run17	6	6	0	0	6
					9	9		0	Cyst wall	M4				s7_run10	9	9	0	0	9
					6	6		0	Serous	Borderline Human 12				s5_run34	6	6	0	0	6
					8	8		0	NOSE cell culture	NOSE cell culture				s1_run10	8	8	0	0	8
					7	7		0	Cyst wall	ENDO M1				s8_run17	7	7	0	0	7
hsa-bcm-miR-218	hairpin_218	Potential	Intron IHH	TCGAGGACTGGTGGAAGGGCCTT	34	62		0	Endometrium	EM25	-1	219631648	219631722	s7_run14	34	62	0	0	62
					22	49		0	Endometrioid	EC1				s8_run35	22	49	0	0	49
hsa-bcm-miR-219	hairpin_219	High confidence	Intergenic	TGTGTTAGAATAGGGGCAATAA	17	30		0	Clear cell culture	ES2 clear cell culture, subconfluent	1	18563304	18563377	s3_run9	17	30	0	0	30
hsa-bcm-miR-222	hairpin_222	Potential	Intron ALK	AGAAGCTGGATGTCAGGAAGAC	9	9		0	Clear cell culture	OVMANA clear cell culture, confluent	-1	29968170	29968243	s4_run17	9	9	0	0	9
hsa-bcm-miR-223	hairpin_223	High confidence	Intergenic	TGAGGATATGGCAGGGAAG	15	21		0	Endometrioid	EC1	1	134601163	134601236	s8_run35	15	21	0	0	21
hsa-bcm-miR-224	hairpin_224	Potential	Intron DMN1	CAGAAGGGGAGTTGGGAGCAGA	7	7		0	Clear cell culture	A2780 clear cell culture, confluent	-1	130047051	130047123	s2_run17	7	7	0	0	7
					5	5		0	Cyst wall	CW2				s7_run21	5	5	0	0	5
					9	14		0	Serous	Primary Human 15b				s6_run34	9	14	0	0	14
					10	10		0	Secretory	Human Myo 8				s6_run23	10	10	0	0	10
					20	20		0	Endometrium	EM30				s8_run19	20	20	0	0	20
					12	12		0	Endometrium	EM32				s8_run21	12	12	0	0	12
hsa-bcm-miR-226-1	hairpin_226	High confidence	Intron LONRF1 +	TGGCCAAAAAGCAGGCAGAGA	7	7		0	Cyst wall	CW7	-1	12629112	12629184	s7_run7	7	7	0	0	7
hsa-bcm-miR-227	hairpin_227	Potential	Intron AK170913	AAAAGGGGGCTGAGGTGGAGG	0	6		0	SKN (Cell Line)	SKN	-1	121528013	121528085	s5_run19	0	6	0	0	6
hsa-bcm-miR-21-2	hairpin_228	High confidence	Intron BC058547	TGTGATATCATGGTTCCTGGGA	89	136		0	Clear cell culture	ES2 clear cell culture, subconfluent	-1	136881157	136881228	s3_run9	89	136	0	0	136
hsa-bcm-miR-230	hairpin_230	High confidence	Intergenic	CAGGCGTCTGTCTACGTGGCTT	5	5		0	Serous	Primary Human 15b	-1	77032732	77032802	s6_run34	5	5	0	0	5
hsa-bcm-miR-231	hairpin_231	Not likely	5' UTR GLUL	GTGGGAGAAGAGCGGAGCGTG	0	0		0	ULMS	U7	-1	180627477	180627547	s6_run29	0	0	0	0	6
					0	9		0	Endometrium	EM30				s8_run19	0	9	0	0	9
hsa-bcm-miR-232	hairpin_232	High confidence	LTR	CAGGTAGATATTTGATAGGCAT	6	6		0	Endometrium	EM2	-1	111313576	111313646	s5_run7	6	6	0	0	6
					9	15		0	Endometrium	EM24				s7_run18	9	15	0	0	15
hsa-bcm-miR-236	hairpin_236	Not likely	3' UTR SLC38A1	CACTGCCACTGCTGAATCAGAG	7	7		0	Clear cell culture	RMG1 clear cell culture, confluent	-1	44868417	44868487	s5_run17	7	7	0	0	7
hsa-bcm-miR-237	hairpin_237	Potential	Intergenic	CAGCGGCTGCGCATCTCGGG	5	5		0	Serous	Primary Human 15b	-1	206109069	206109138	s6_run34	5	5	0	0	5
hsa-bcm-miR-239	hairpin_239	Potential	Intron ATG4B	TGTCGAGGATGAAAGCATGAGGCGC	7	7		0	Clear cell culture	OVISE clear cell culture, subconfluent	1	84227	84296	s5_run9	7	7	0	0	7
hsa-bcm-miR-241	hairpin_241	Not likely	28s rRNA	GGGCTTGGCAGAATCAGC	11	87		0	NOSE cell culture	NOSE cell culture	-1	80459540	80459607	s4_run10	11	87	0	0	87
hsa-bcm-miR-243	hairpin_243	Potential	Intron TRIP6	TGAGGGACCCAGGACAGGAGAA	10	16		0	Clear cell culture	OVSAYO clear cell culture, confluent	1	100303598	100303665	s7_run17	10	16	0	0	16
hsa-bcm-miR-244	hairpin_244	Confirmed	Intron EDA-A2	CTGTCCTAAGGTTGTTGAGTT	19	19	TCTTCAACCTCAGGACTTGCA	0	Serous	Primary Human 16399	1	69159432	69159498	s7_run37	19	19	0	0	19
					31	49		0	Clear cell culture	OVMANA clear cell culture, confluent				s4_run17	31	49	0	0	49
					6	6		0	Secretory	Human Fib 16				s8_run39	6	6	0	0	6
					9	9		0	Clear cell culture	A2780 clear cell culture, confluent				s2_run17	9	9	0	0	9
					6	6		0	Secretory	Human Fib 13				s7_run29	6	6	0	0	6
					6	6		0	Clear cell culture	OVAS clear cell culture, confluent				s3_run10	6	6	0	0	6
					17	23		7	Serous	Primary Human 11888				s8_run37	17	23	0	7	30
					5	5		0	Endometrium	EM2				s5_run7	5	5	0	0	5
					28	35		7	Clear cell culture	KK clear cell culture, confluent				s3_run17	28	35	0	7	42
					44	44		8	Serous	Primary Human 15b				s6_run34	44	44	0	8	52
					14	14		14	Clear cell culture	SMOV2 clear cell culture, subconfluent				s6_run17	14	14	0	14	28
					37	44		6	Endometrioid	EC1				s8_run35	37	44	0	6	50
					17	17		9	Clear cell culture	OVISE clear cell culture, subconfluent				s5_run9	17	17	0	9	26
					7	12		0	Proliferative	Human Fib 17				s7_run40	7	12	0	0	12
					7	7		0	ULMS	U4				s5_run29	7	7	0	0	7
					5	5		0	Proliferative	Human Myo 17				s6_run40	5	5	0	0	5
hsa-bcm-miR-245	hairpin_245	High confidence	Intergenic	TTCGCGGGCGAAGGCAAAGTC	0	5		0	ULMS	U7	1	247087199	247087265	s6_run29	0	5	0	0	5
					0	6		0	Endometrioid	EC1				s8_run35	0	6	0	0	6
					5	16		0	Endometrium	EM30				s8_run19	5	16	0	0	16
					0	16		0	Cyst wall	CW7				s7_run7	0	16	0	0	16
					5	5		0	Secretory	Human Fib 12				s4_run29	5	5	0	0	5
hsa-bcm-miR-246	hairpin_246	Potential	SNORA74A	ATCCAGCGGTTGTCAGCTATCCAGGCT	5	5		0	Clear cell culture	RMG1 clear cell culture, confluent	1	138642366	138642431	s5_run17	5	5	0	0	5
					10	10		0	Clear cell culture	OVISE clear cell culture, subconfluent				s5_run9	10	10	0	0	10
					11	11		0	Serous	Borderline Human 12				s5_run34	11	11	0	0	11
hsa-bcm-miR-247	hairpin_247	Not likely	Intron FAM64A	TGAGTGCGGGCTGGGCACAAGT	0	5		141	Clear cell culture	A2780 clear cell culture, confluent	1	6288526	6288591	s2_run17	0	5	0	141	146
hsa-bcm-miR-252	hairpin_252	Potential	Intron MAYO1E	TCCTCCCATGCCAAGAACTC	7	13		0	Clear cell culture	RMG1 clear cell culture, confluent	-1	57250681	57250745	s5_run17	7	13	0	0	13
hsa-bcm-miR-253-1	hairpin_253	Not likely	LTR	AAGGGAACTCAGAAGCTGGCG	8	8		0	Clear cell culture	OVMANA clear cell culture, confluent	-1	102905470	102905533	s4_run17	8	8	0	0	8
					9	9		0	Clear cell culture	OVSAYO clear cell culture, confluent				s7_run17	9	9	0	0	9
hsa-bcm-miR-256	hairpin_256	Potential	SNORA3	ATCGAGGCTAGAGTCACGCTTGG	32	43		0	Serous	Primary Human 15b	1	8662348	8662411	s6_run34	32	43	0	0	43
					15	22		0	Clear cell culture	OVSAYO clear cell culture, confluent				s7_run17	15	22	0	0	22
hsa-bcm-miR-253-2	hairpin_257	Not likely	LTR	AAGGGAACTCAGAAGCTGGCG	8	8		0	Clear cell culture	OVMANA clear cell culture, confluent	1	23668062	23668125	s4_run17	8	8	0	0	8
					9	9		0	Clear cell culture	OVSAYO clear cell culture, confluent	1	18615122	18615185	s7_run17	9	9	0	0	9
hsa-bcm-miR-226-2	hairpin_258	High confidence	Intron LONRF1 -	TGGCCAAAAAGCAGGCAGAGA	7	7		0	Cyst wall	CW7	1	12629117	12629179	s7_run7	7	7	0	0	7
hsa-bcm-miR-260	hairpin_260	Potential	5' UTR SEC14L2	GCGGCGAGGACGAGTCTGT	14	32		0	Endometrium	EM30	1	29123018	29123078	s8_run19	14	32	0	0	32
hsa-bcm-miR-261	hairpin_261	High confidence	Intron ACBD6	TAAATAGAGTAGGCAAAGGACA	5	5		0	Clear cell culture	OVMANA clear cell culture, confluent	-1	178674081	178674139	s4_run17	5	5	0	0	5
					12	12		0	Clear cell culture	A2780 clear cell culture, confluent				s2_run17	12	12	0	0	12
					6	6		0	Clear cell culture	OVAS clear cell culture, confluent				s3_run10	6	6	0	0	6
					6	6		0	Clear cell culture	OVISE clear cell culture, subconfluent				s5_run9	6	6	0	0	6
hsa-bcm-miR-262	hairpin_262	High confidence	ncRNA	TGGGCTAAGGGAGATGATTGGGT	7	7		0	SKN (Cell Line)	SKN	1	153650065	153650123	s5_run19	7	7	0	0	7
					7	7		0	Clear cell culture	OVMANA clear cell culture, confluent				s4_run17	7	7	0	0	7
					6	6		0	Clear cell culture	A2780 clear cell culture, confluent				s2_run17	6	6	0	0	6
					5	5		0	Proliferative	Human Fib 15				s6_run39	5	5	0	0	5
					12	12		0	Secretory	Human Fib 8				s7_run23	12	12	0	0	12
					6	6		0	Endometrium	EM4				s5_run18	6	6	0	0	6
					5	5		0	Endometrium	Endomet 3				s6_run7	5	5	0	0	5
					7	7		0	Clear cell culture	KK clear cell culture, confluent				s3_run17	7	7	0	0	7
					10	10		0	Serous	Primary Human 15b				s6_run34	10	10	0	0	10
					8	8		0	NOSE cell culture	NOSE cell culture				s5_run10	8	8	0	0	8
					6	6		0	Secretory	Human Myo 14				s5_run45	6	6	0	0	6
					6	6		0	Clear cell culture	IGROV1 clear cell culture, confluent				s2_run10	6	6	0	0	6
					6	11		0	Secretory	Human Myo 7				s2_run19	6	11	0	0	11
					32	37		0	Clear cell culture	OVSAYO clear cell culture, confluent				s7_run17	32	37	0	0	37
					8	8		0	Secretory	Human Myo 10				s5_run21	8	8	0	0	8
					26	39		0	Clear cell culture	RMG1 clear cell culture, confluent				s5_run17	26	39	0	0	39
					14	14		0	Clear cell culture	SMOV2 clear cell culture, subconfluent				s6_run17	14	14	0	0	14
					8	8		0	Serous	Borderline Human 12				s5_run34	8	8	0	0	8
					6	6		0	Secretory	Human Fib 7				s3_run19	6	6	0	0	6
					8	8		0	Cyst wall	Endo M2				s3_run7	8	8	0	0	8
					6	6		0	Clear cell culture	TOV21G clear cell culture, confluent				s2_run9	6	6	0	0	6
					20	33		0	Endometrium	EM30				s8_run19	20	33	0	0	33
					10	16		0	Endometrium	EM32				s8_run21	10	16	0	0	16
					13	13		0	Endometrium	EM21				s7_run19	13	13	0	0	13
					7	7		0	Cyst wall	CW6 (51308)				s8_run18	7	7	0	0	7
					8	8		0	NOSE cell culture	NOSE cell culture				s4_run10	8	8	0	0	8
hsa-bcm-miR-265	hairpin_265	High confidence	Intergenic	GGAGGAACCTTGGAGCTTCGGC	11	11		0	W. Proliferative	Human Fib 11	-1	29886048	29886105	s8_run28	11	11	0	0	11
					6	6		0	SKN (Cell Line)	SKN				s5_run19	6	6	0	0	6
					10	16		0	Clear cell culture	OVMANA clear cell culture, confluent				s4_run17	10	16	0	0	16
					16	16		0	Clear cell culture	ES2 clear cell culture, subconfluent				s3_run9	16	16	0	0	16
					10	10		0	Secretory	Human Fib 16				s8_run39	10	10	0	0	10
					10	10		0	Serous	Cell Line Ovcar8				s8_run15	10	10	0	0	10
					16	16		0	Clear cell culture	A2780 clear cell culture, confluent				s2_run17	16	16	0	0	16
					9	9		0	Endometrium	Endomet 1				s4_run7	9	9	0	0	9
					9	9		0	Proliferative	Human Fib 1				s5_run11	9	9	0	0	9
					6	6		0	Proliferative	Human Myo 3				s6_run11	6	6	0	0	6
					7	7		0	Proliferative	Human Fib 15				s6_run39	7	7	0	0	7
					8	13		0	W. Proliferative	Human Myo 11				s3_run29	8	13	0	0	13
					16	16		0	Cyst wall	CW9				s2_run7	16	16	0	0	16
					22	22		0	Clear cell culture	OVTOKO clear cell culture, confluent				s2_run11	22	22	0	0	22
					5	5		0	Serous	Primary Human 11888				s8_run37	5	5	0	0	5
					14	14		0	Endometrium	EM2				s5_run7	14	14	0	0	14
					11	11		0	Secretory	Human Fib 8				s7_run23	11	11	0	0	11
					6	6		0	Endometrium	EM12				s6_run10	6	6	0	0	6
					11	11		0	TLSMC (Cell Line)	TLSMC				s4_run19	11	11	0	0	11
					5	10		0	Clear cell culture	KK clear cell culture, confluent				s3_run17	5	10	0	0	10
					10	10		0	Proliferative	Human Myo 9				s8_run23	10	10	0	0	10
					5	5		0	Secretory	Human Fib 10				s6_run21	5	5	0	0	5
					5	5		0	Cyst wall	CW2				s7_run21	5	5	0	0	5
					28	37		0	Serous	Primary Human 15b				s6_run34	28	37	0	0	37
					6	6		0	NOSE cell culture	NOSE cell culture				s5_run10	6	6	0	0	6
					9	9		0	Secretory	Human Myo 14				s5_run45	9	9	0	0	9
					15	15		0	Clear cell culture	IGROV1 clear cell culture, confluent				s2_run10	15	15	0	0	15
					5	5		0	Secretory	Human Myo 13				s8_run29	5	5	0	0	5
					11	11		0	Secretory	Human Myo 7				s2_run19	11	11	0	0	11
					13	19		0	Clear cell culture	OVSAYO clear cell culture, confluent				s7_run17	13	19	0	0	19
					6	6		0	Proliferative	Human Myo 15				s5_run39	6	6	0	0	6
					10	10		0	Proliferative	Human Myo 1				s8_run11	10	10	0	0	10
					11	11		0	Secretory	Human Myo 4				s7_run13	11	11	0	0	11
					15	15		0	Clear cell culture	SMOV2 clear cell culture, subconfluent				s6_run17	15	15	0	0	15
					5	5		0	Endometrioid	EC1				s8_run35	5	5	0	0	5
					6	6		0	Cyst wall	M4				s7_run10	6	6	0	0	6
					15	21		0	ULMS	JH 750				s5_run40	15	21	0	0	21
					14	14		0	Secretory	Human Myo 8				s6_run23	14	14	0	0	14
					7	7		0	Clear cell culture	OVISE clear cell culture, subconfluent				s5_run9	7	7	0	0	7
					20	28		0	ULMS	U4				s5_run29	20	28	0	0	28
					11	11		0	Secretory	Human Fib 7				s3_run19	11	11	0	0	11
					10	10		0	Cyst wall	Endo M2				s3_run7	10	10	0	0	10
					9	9		0	Clear cell culture	TOV21G clear cell culture, confluent				s2_run9	9	9	0	0	9
					18	18		0	Cyst wall	ENDO M1				s8_run17	18	18	0	0	18
					30	30		0	Endometrium	EM30				s8_run19	30	30	0	0	30
					6	6		0	Endometrium	EM20				s6_run18	6	6	0	0	6
					13	13		0	Endometrium	EM21				s7_run19	13	13	0	0	13
					6	15		0	Secretory	Human Fib 12				s4_run29	6	15	0	0	15
					8	8		0	Proliferative	Human Myo 17				s6_run40	8	8	0	0	8
hsa-bcm-miR-266	hairpin_266	Not likely	SINE	TGGGAGGCTGATGTGAGTAGA	6	6		0	Clear cell culture	RMG1 clear cell culture, confluent	-1	29306727	29306783	s5_run17	6	6	0	0	6
hsa-bcm-miR-268	hairpin_268	High confidence	SINE	GAGGCTGATGTGAGTAGACCACT	0	7		0	SKN (Cell Line)	SKN	-1	31768049	31768103	s5_run19	0	7	0	0	7
					5	5		0	Clear cell culture	OVSAYO clear cell culture, confluent				s7_run17	5	5	0	0	5
					31	67		0	Clear cell culture	RMG1 clear cell culture, confluent				s5_run17	31	67	0	0	67
hsa-bcm-miR-269	hairpin_269	Potential	Intergenic	TCCTGCGTAGGATCTGAGGAGT	7	7		0	Clear cell culture	OVSAYO clear cell culture, confluent	1	29658650	29658704	s7_run17	7	7	0	0	7

## Sheet: Color Legend
Novel miRNA criteria:
	1. Stem loop structure
	2. Minimum free energy< -25 kcal/mol
	3. Strong clean signal in specific region of 15-25 nt reference hairpin (”sprinkled” sequences across the full length of hairpin FAIL)
	4. Signal should not fall in loop
	5. In the hand folding analysis, predicted Drosha and Dicer cut sites must be able to yield a mature miR sequence that matches to the actual miR sequence read.
	6. Stable 5’ end (+/- 1nt) (highly variable 5’ ends FAIL)
	7. Highly variable 3’ end
	8. Presence of star sequence at lower copy number and matching miR with 3’ 2 nucleotide overhang.
	9. Does not map to rRNA, tRNA
	10. Does not map to snoRNA, snRNA
LEGEND
	Not a novel microRNA (If any of these criteria failed; 1, 2, 3, 4, 9)
	Potential novel microRNAs with weak predicted processing sites in hairpin (Passed 1, 2, 3, 4, 6, 9)
	High-confident novel microRNAs without star sequence (Passed 1, 2, 3, 4, 5, 9, 10)
	High-confident novel microRNAs with star sequence (Passed 1, 2, 3, 4, 5, 6, 7, 8, 9, 10)
